# Supplementary material for: In situ reversible redox switching of first hyperpolarizability of bimetallic ruthenium complexes
Source: Royal Society of Chemistry journal article supplement (doi:10.1039/c9cp00946a), 2019-01-01
Supplement: c9cp00946a1.pdf [file c9cp00946a1.pdf]

**Electronic Supplementary Information**

**In situ Reversible Redox Switching of First Hyperpolarizability of bimetallic  
Ruthenium complexes**

Karthika C., Sarath Kumar S. R., Kathuria L., Das\* P. K., and Samuelson A. G.,

Department of Inorganic and Physical Chemistry, Indian Institute of Science, Bangalore  
560012, India

**Figure S1. (a)**  $^1\text{H}$  NMR of  $\text{Ru}(\text{acac})_2(\text{CH}_3\text{CN})_2$ , **1** and **(b)**  $[(\text{acac})_2\text{Ru-bptz-Ru}(\text{acac})_2]$ , **2** in  $\text{CDCl}_3$

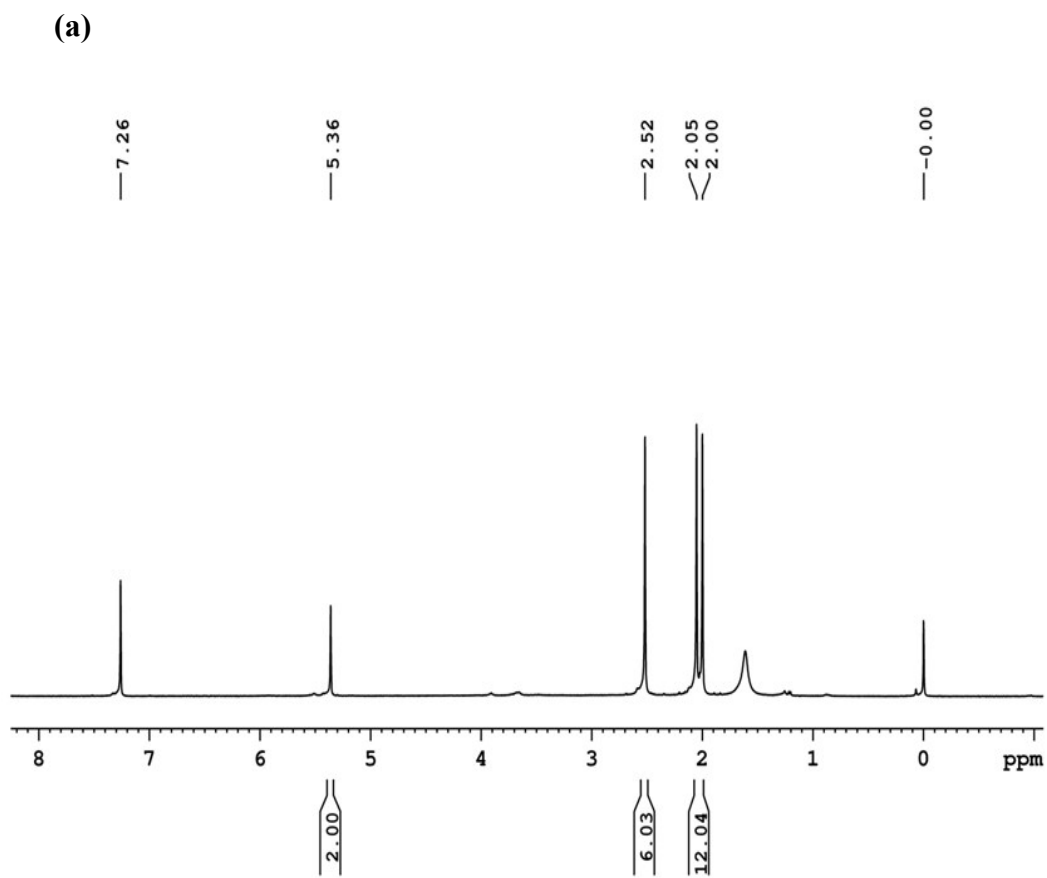

(b)

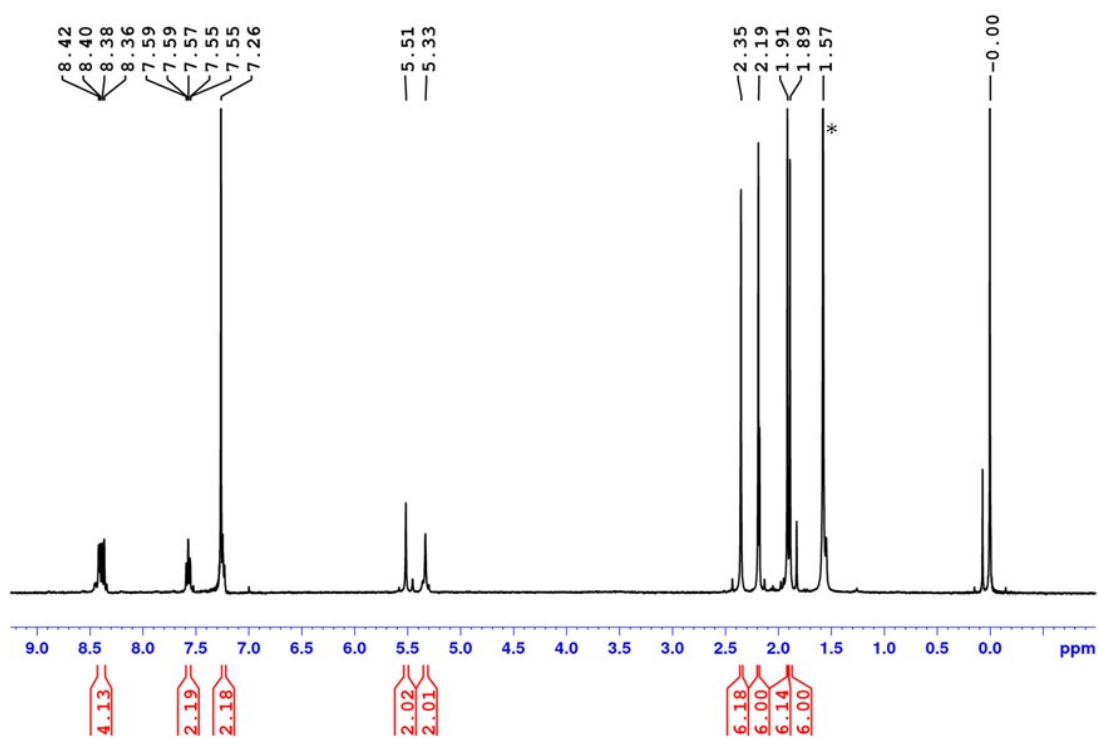

\* Indicates a signal of water impurity.

**Figure S2.** ESI-MS data of the **(a)** monometallic, **1** and **(b)** bimetallic

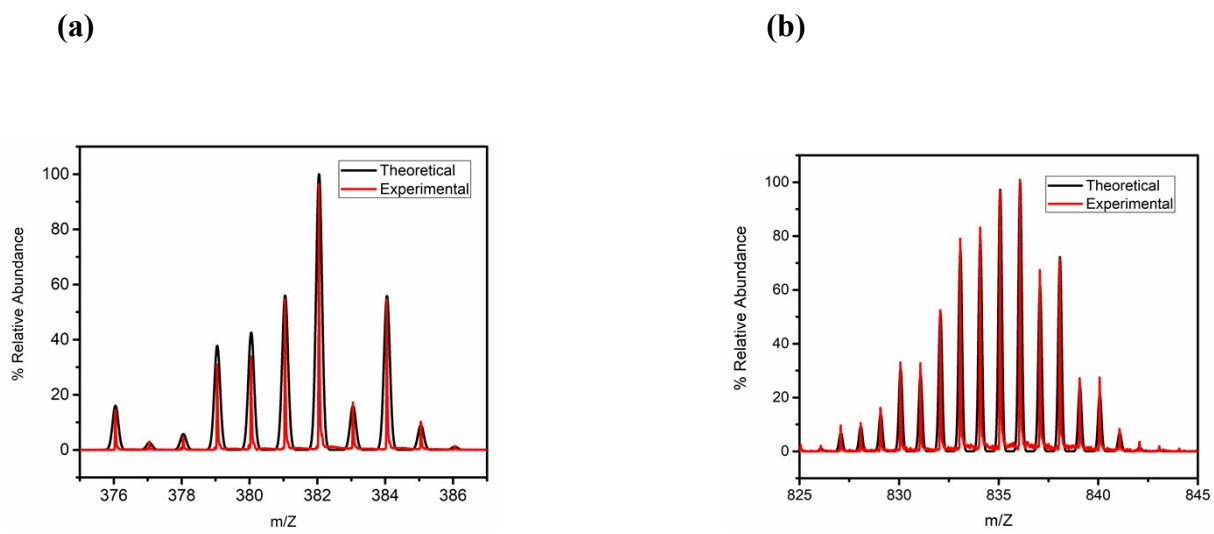

**Figure S3.** Quadratic dependence of  $I_{2\omega}$  on  $I_{\omega}$  for complex **2** in  $\text{CH}_2\text{Cl}_2$  ( $6 \times 10^{-5}$  M). The experimental data were fitted with the straight line of the form  $\ln I_{2\omega} = \ln A + n \ln I_{\omega}$ . Where  $I_{2\omega}$  is the output power,  $I_{\omega}$  is the input power,  $A$  is proportionality constant and  $n$  is the order of process. Here the value of  $n$  extracted from the fit is 2.03.

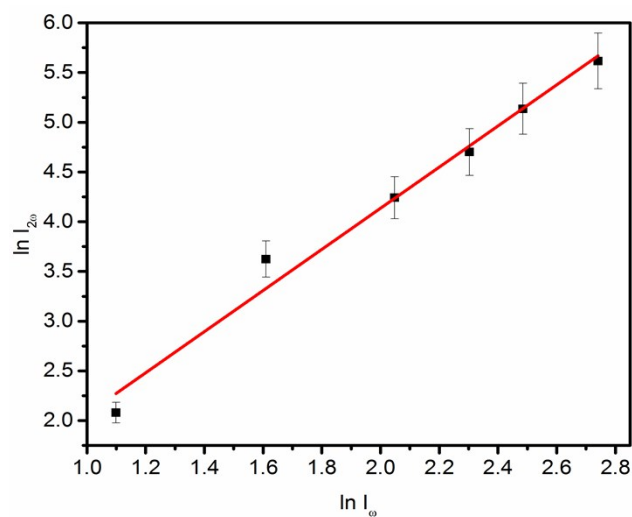

**Figure S4.** Wavelength scan of SHLS signal for complex **2** in  $\text{CH}_2\text{Cl}_2$  ( $1 \times 10^{-5}$  M, 10 mJ/ pulse)

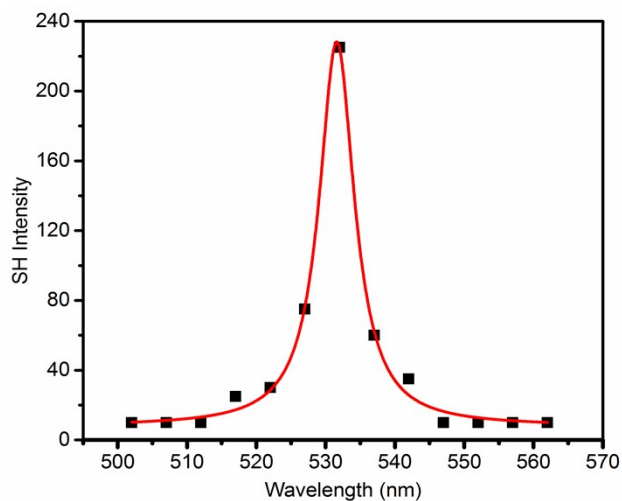

**Figure S5:** XYZ coordinates of optimized geometries **(a)** monometallic, **1** and **(b)** bimetallic,

**2**

**(a)**

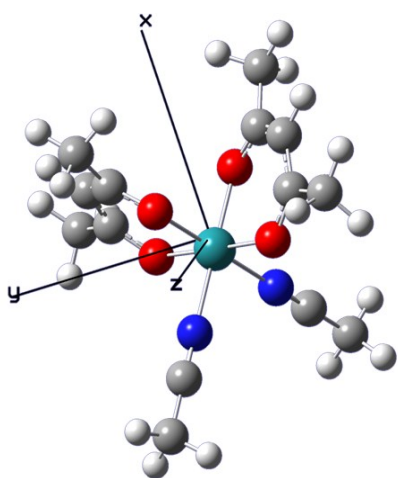

**(b)**

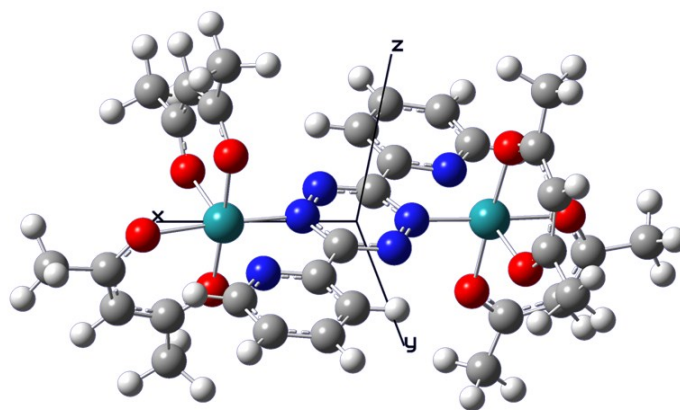

Mono, 1

|    | <b>X</b> | <b>Y</b> | <b>Z</b> |
|----|----------|----------|----------|
| C  | 2.04467  | 1.80979  | -0.71525 |
| C  | 2.80037  | 1.51587  | 0.43409  |
| C  | 2.50953  | 0.56032  | 1.42689  |
| C  | 2.53195  | 2.90145  | -1.6458  |
| C  | 3.4579   | 0.42595  | 2.60164  |
| O  | 0.96049  | 1.25139  | -1.07626 |
| O  | 1.51308  | -0.2272  | 1.45685  |
| Ru | 0.00005  | -0.2542  | -0.00152 |
| O  | -0.9689  | 1.2397   | 1.08152  |
| C  | -2.05549 | 1.79507  | 0.72318  |
| C  | -2.54866 | 2.87857  | 1.66015  |
| C  | -2.8092  | 1.50419  | -0.42822 |
| C  | -2.51374 | 0.55498  | -1.42571 |
| C  | -3.46124 | 0.42211  | -2.60134 |
| O  | -1.51369 | -0.22782 | -1.45936 |
| N  | 1.01582  | -1.66857 | -1.06658 |
| N  | -1.00605 | -1.68052 | 1.05725  |
| C  | 1.58601  | -2.45391 | -1.6883  |
| C  | -1.56944 | -2.47094 | 1.67873  |
| C  | 2.30136  | -3.44409 | -2.47445 |
| C  | -2.27546 | -3.46633 | 2.46675  |

|   |          |          |          |
|---|----------|----------|----------|
| H | 3.70098  | 2.09941  | 0.57826  |
| H | 3.48429  | 3.32978  | -1.33299 |
| H | 2.63698  | 2.50248  | -2.6585  |
| H | 1.78578  | 3.70008  | -1.69336 |
| H | 4.31243  | 1.09929  | 2.53397  |
| H | 2.91982  | 0.63224  | 3.53138  |
| H | 3.82231  | -0.60329 | 2.66495  |
| H | -1.80351 | 3.67741  | 1.71841  |
| H | -3.49987 | 3.30847  | 1.34608  |
| H | -2.65869 | 2.471    | 2.66893  |
| H | -3.71235 | 2.08443  | -0.56972 |
| H | -4.31861 | 1.09155  | -2.53078 |
| H | -2.9238  | 0.63495  | -3.52998 |
| H | -3.82137 | -0.60833 | -2.66953 |
| H | 2.94857  | -2.95156 | -3.20258 |
| H | 2.91745  | -4.06945 | -1.82556 |
| H | 1.59607  | -4.0827  | -3.00975 |
| H | -1.62454 | -4.31914 | 2.66884  |
| H | -2.59359 | -3.03646 | 3.41848  |
| H | -3.15797 | -3.81871 | 1.9295   |



## Bimetallic, 2

|    |          |          |          |
|----|----------|----------|----------|
| Ru | -3.35231 | -0.06027 | 0.02414  |
| Ru | 3.35245  | 0.06017  | 0.02401  |
| O  | -5.42069 | -0.3669  | -0.18325 |
| O  | -3.18791 | 0.09827  | -2.05444 |
| O  | -3.62665 | -0.19586 | 2.08311  |
| O  | -3.77445 | 1.99473  | 0.06792  |
| O  | 5.42074  | 0.36688  | -0.18363 |
| O  | 3.18777  | -0.09896 | -2.05445 |
| O  | 3.62684  | 0.19633  | 2.083    |
| O  | 3.77452  | -1.99485 | 0.06838  |
| N  | -2.82662 | -2.07367 | -0.00035 |
| N  | -1.3617  | 0.08117  | 0.15476  |
| N  | -0.64572 | 1.20516  | 0.14208  |
| N  | 0.64582  | -1.20533 | 0.14218  |
| N  | 1.36178  | -0.08135 | 0.15479  |
| N  | 2.82669  | 2.07354  | -0.00076 |
| C  | -0.6669  | -1.1049  | 0.13124  |
| C  | -1.49371 | -2.31457 | 0.07893  |
| C  | -0.97149 | -3.60461 | 0.10879  |
| H  | 0.10009  | -3.74108 | 0.1691   |
| C  | -1.84815 | -4.68147 | 0.06154  |

|   |          |          |          |
|---|----------|----------|----------|
| H | -1.47072 | -5.69689 | 0.08355  |
| C | -3.21755 | -4.43197 | -0.00965 |
| H | -3.93564 | -5.24216 | -0.04281 |
| C | -3.66822 | -3.11828 | -0.03728 |
| H | -4.72084 | -2.87166 | -0.08472 |
| C | 0.66699  | 1.10471  | 0.13118  |
| C | 1.49379  | 2.3144   | 0.07879  |
| C | 0.97152  | 3.60441  | 0.10891  |
| H | -0.10005 | 3.74081  | 0.16948  |
| C | 1.84811  | 4.68132  | 0.0616   |
| H | 1.47065  | 5.69672  | 0.08384  |
| C | 3.21751  | 4.43187  | -0.00992 |
| H | 3.93556  | 5.24209  | -0.04316 |
| C | 3.66822  | 3.11821  | -0.03778 |
| H | 4.72085  | 2.87166  | -0.08545 |
| C | -6.07017 | -0.2899  | -1.27533 |
| C | -5.52424 | -0.06997 | -2.55194 |
| H | -6.22185 | -0.03656 | -3.37885 |
| C | -4.16503 | 0.09935  | -2.8702  |
| C | -7.56703 | -0.46832 | -1.14077 |
| H | -7.78309 | -1.4398  | -0.68696 |
| H | -8.08848 | -0.40168 | -2.09557 |
| H | -7.96569 | 0.2943   | -0.46579 |
| C | -3.77444 | 0.30771  | -4.31743 |
| H | -3.04682 | -0.45239 | -4.61474 |

|   |          |          |          |
|---|----------|----------|----------|
| H | -3.28442 | 1.2795   | -4.42603 |
| H | -4.62737 | 0.26594  | -4.99461 |
| C | -3.95571 | 0.7882   | 2.82709  |
| C | -4.16731 | 2.11574  | 2.42479  |
| H | -4.4409  | 2.81493  | 3.20454  |
| C | -4.07571 | 2.63872  | 1.11832  |
| C | -4.1271  | 0.43204  | 4.28805  |
| H | -4.89686 | -0.33846 | 4.38784  |
| H | -4.40445 | 1.28896  | 4.90162  |
| H | -3.19663 | 0.0061   | 4.67394  |
| C | -4.35568 | 4.11166  | 0.90497  |
| H | -3.46459 | 4.59791  | 0.49747  |
| H | -4.64806 | 4.62437  | 1.82129  |
| H | -5.15063 | 4.22881  | 0.16352  |
| C | 6.07007  | 0.29007  | -1.27579 |
| C | 5.52396  | 0.07014  | -2.55235 |
| H | 6.22145  | 0.03698  | -3.37937 |
| C | 4.16479  | -0.09969 | -2.87039 |
| C | 7.56694  | 0.46856  | -1.14144 |
| H | 7.96599  | -0.2953  | -0.46809 |
| H | 7.783    | 1.43918  | -0.68584 |
| H | 8.08806  | 0.40377  | -2.09656 |
| C | 3.77401  | -0.30818 | -4.31754 |
| H | 3.2841   | -1.28004 | -4.42604 |
| H | 4.62683  | -0.26632 | -4.99485 |

|   |         |          |          |
|---|---------|----------|----------|
| H | 3.04624 | 0.45182  | -4.61477 |
| C | 3.95589 | -0.78753 | 2.82723  |
| C | 4.1673  | -2.11522 | 2.4253   |
| H | 4.44079 | -2.81422 | 3.20526  |
| C | 4.07557 | -2.63859 | 1.11901  |
| C | 4.12774 | -0.43093 | 4.28804  |
| H | 3.19843 | -0.00189 | 4.67328  |
| H | 4.89984 | 0.33729  | 4.38762  |
| H | 4.40236 | -1.28826 | 4.90226  |
| C | 4.35493 | -4.11171 | 0.90618  |
| H | 3.463   | -4.59809 | 0.50067  |
| H | 4.6488  | -4.62384 | 1.82236  |
| H | 5.1485  | -4.22955 | 0.16338  |

**Figure S6.** Molecular orbitals involved in transitions of Ruthenium complexes obtained from TD-DFT calculations.

| Complex               | $\lambda^{\text{theory}}$<br>(nm) | oscillator<br>strength | Transitions<br>(% contributions)                                                                                                                                                        |
|-----------------------|-----------------------------------|------------------------|-----------------------------------------------------------------------------------------------------------------------------------------------------------------------------------------|
| <b>1</b>              | 310                               | 0.0281                 | HOMO $\rightarrow$ LUMO (89)                                                                                                                                                            |
| <b>1<sup>+</sup></b>  | 321                               | 0.0038                 | HOMO-3( $\alpha$ ) $\rightarrow$ LUMO+2 ( $\alpha$ ) (48)<br><br>HOMO( $\alpha$ ) $\rightarrow$ LUMO( $\alpha$ ) (34)<br><br>HOMO-2( $\alpha$ ) $\rightarrow$ LUMO+3( $\alpha$ ) (17)   |
|                       | 528                               | 0.65                   | HOMO( $\beta$ ) $\rightarrow$ LUMO( $\beta$ ) (91)                                                                                                                                      |
| <b>2</b>              |                                   | 0.438                  | HOMO $\rightarrow$ LUMO+1 (44)<br><br>HOMO $\rightarrow$ LUMO (22)<br><br>HOMO-2 $\rightarrow$ LUMO(20)                                                                                 |
| <b>2<sup>+</sup></b>  | 632                               | 0.362                  | HOMO-1( $\beta$ ) $\rightarrow$ LUMO( $\beta$ ) (52)<br><br>HOMO-1( $\alpha$ ) $\rightarrow$ LUMO( $\alpha$ ) (42)                                                                      |
|                       | 1400                              | 0.0154                 | HOMO LUMO(72)                                                                                                                                                                           |
| <b>2<sup>2+</sup></b> | 501                               | 0.217                  | HOMO-3 ( $\beta$ ) $\rightarrow$ LUMO+3 ( $\beta$ ) (39)<br><br>HOMO-2( $\beta$ ) $\rightarrow$ LUMO+1( $\beta$ ) (24.5)<br><br>HOMO-2 ( $\beta$ ) $\rightarrow$ LUMO+4( $\beta$ ) (15) |

**Figure S7.** Molecular orbitals involved in major contributing transitions of Ruthenium complexes obtained from TD-DFT calculations.

| Complex              | $\lambda^{\text{theory}}$<br>(nm) | Ground State                                                                        | Excited State                                                                         |
|----------------------|-----------------------------------|-------------------------------------------------------------------------------------|---------------------------------------------------------------------------------------|
| <b>1</b>             | 310<br><br>( $\pi$ - $\pi^*$ )    | 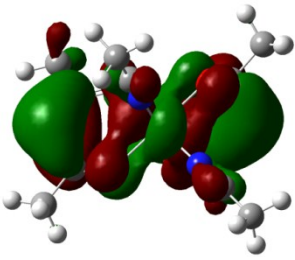   |    |
| <b>1<sup>+</sup></b> | 319<br><br>( $\pi$ - $\pi^*$ )    |   |   |
|                      | 600<br>(LMCT)                     |  |  |
| <b>2</b>             | 555<br>(MLCT)                     |  |  |



**Figure S9.** Peak current dependence on concentration of mononuclear Ru complex at 40 mV/s

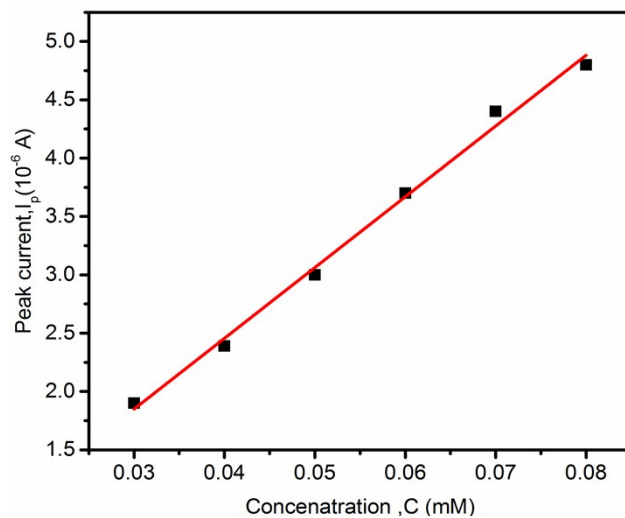

**Figure S10.** Peak current dependence on square root of scan rate,  $v$  of mononuclear Ru complex

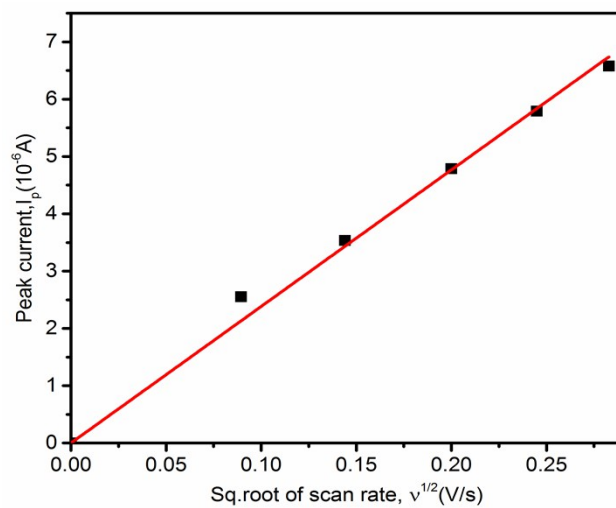



**Figure S11.** Bulk electrolysis of complex, **1** ( $10^{-5}$  M) at 0.35 V for 30 minutes

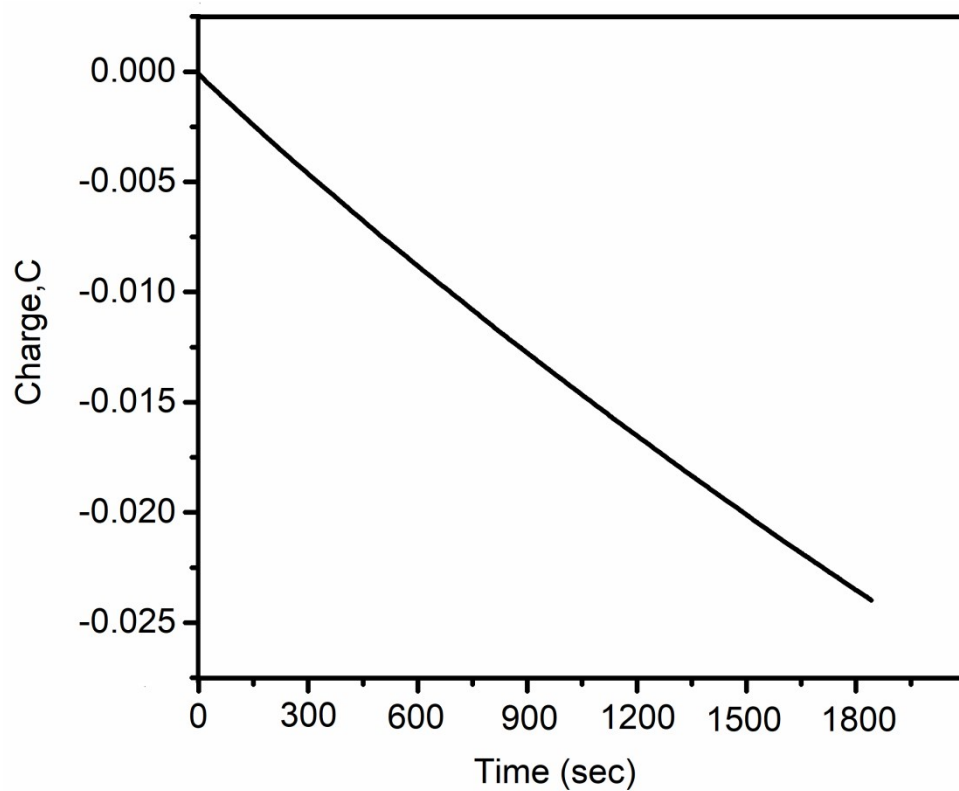

**Figure S12.** Concentration dependence studies of (a) Complex 1<sup>+</sup> (b) Complex 2<sup>+</sup> (c) Complex 2<sup>2+</sup>

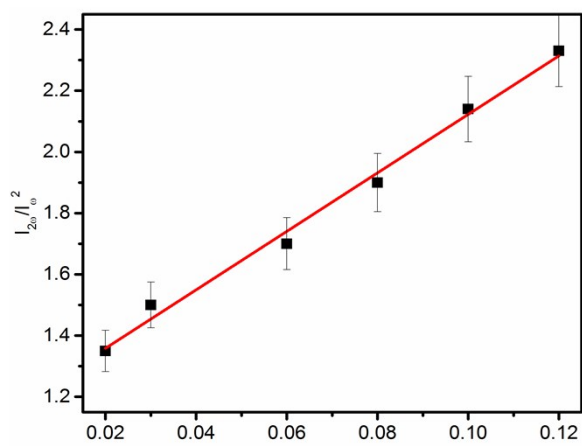

(a) Complex 1<sup>+</sup>

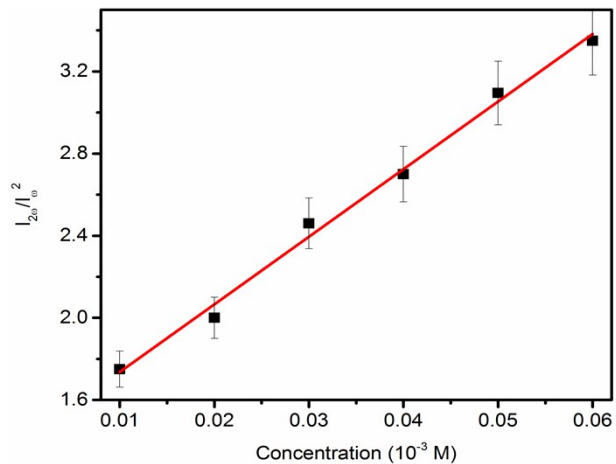

(b) Complex 2<sup>+</sup>

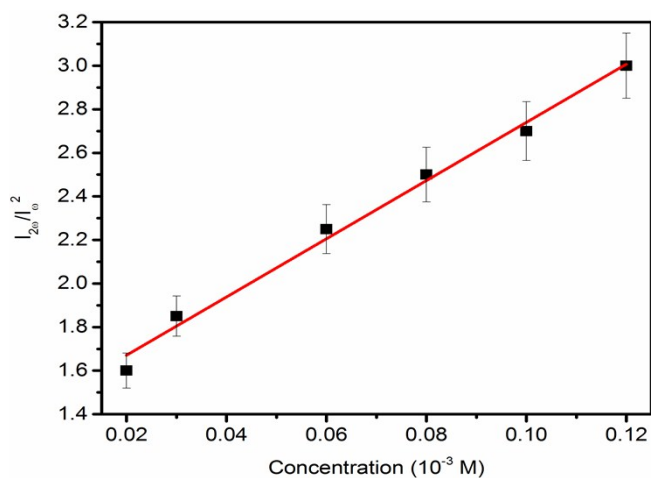

(c) Complex 2<sup>2+</sup>
